# Supplementary material
Source: publisher figshare collection journal article supplement (https://frontiersin.figshare.com/ndownloader/files/12403463)
Supplement: Supplementary file [file 12403463]

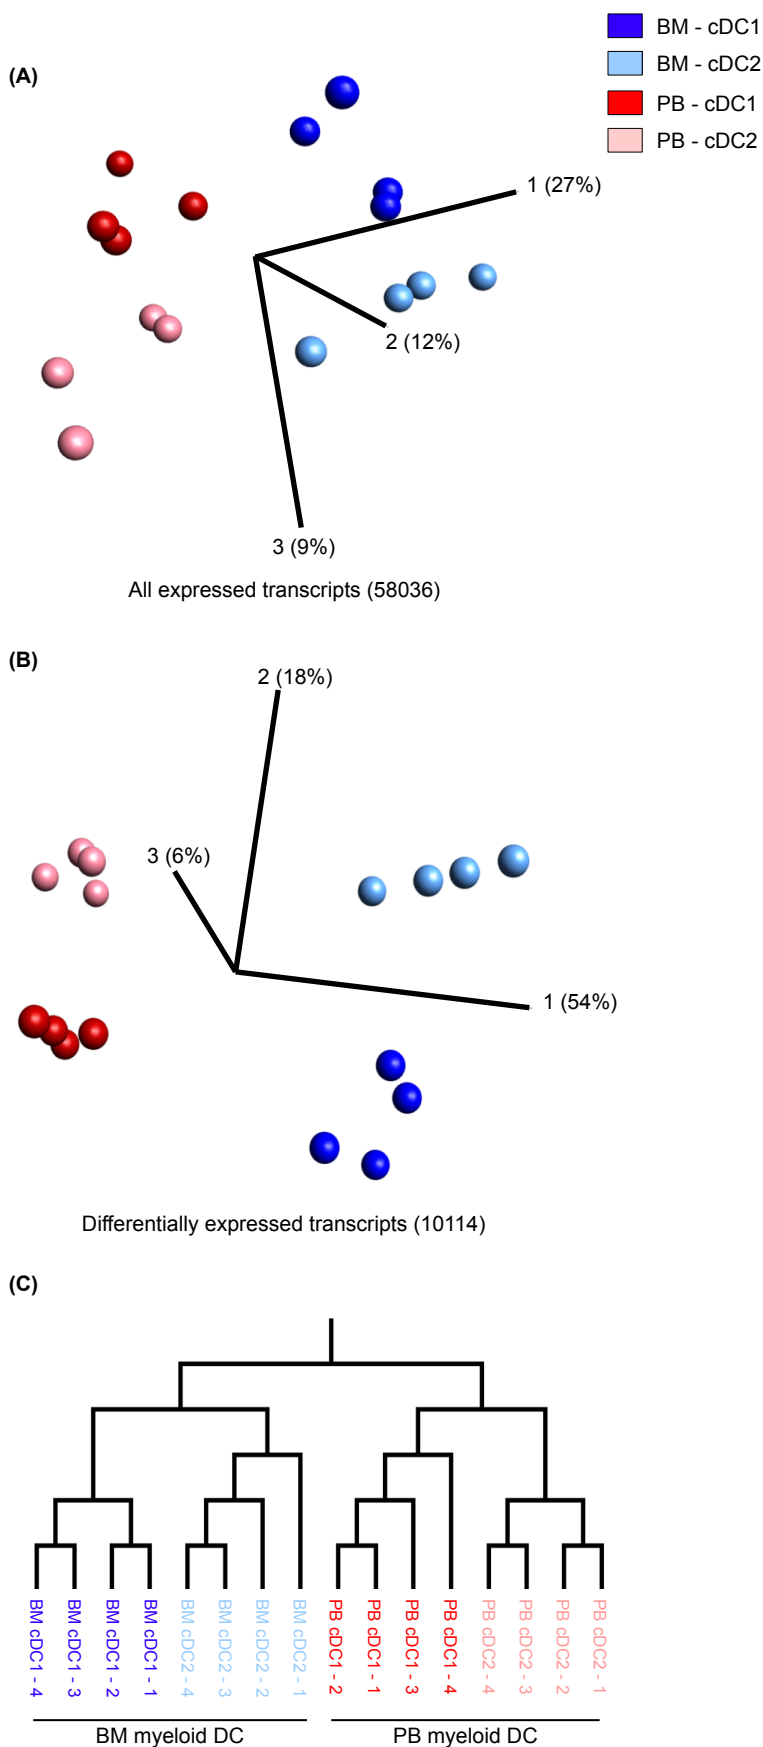

**Supplemental figure 2. PCA and hierarchical clustering for DC subsets only.** Relationship between cDC1 and cDC2 in the peripheral blood and bone marrow. **(A)** Principal component analysis (PCA) of all expressed transcripts and **(B)** for differentially expressed transcripts. Percentages shown reflect the degree of total variation within each component. **(C)** Hierarchical clustering, based on the top 10,000 differentially expressed genes, of replicate samples.
